# Supplementary material for: Capturing ammonium nitrate in a synthetic uranium oxide hydrate phase: revealing the role of ammonium ions and anion inclusions
Source: Royal Society of Chemistry journal article supplement (doi:10.1039/d4dt01372g), 2024-01-01
Supplement: d4dt01372g1.pdf [file d4dt01372g1.pdf]

# Capturing ammonium nitrate in a synthetic uranium oxide hydrate phase: revealing the role of ammonium ions and anion inclusions

Yingjie Zhang<sup>\*a</sup>, Timothy A. Ablott,<sup>a</sup> Maria K. Nicholas,<sup>a</sup> Inna Karatchevtseva,<sup>a</sup> and Jakub Plášil<sup>b</sup>

<sup>a</sup> *Australian Nuclear Science and Technology Organisation, Locked Bag 2001, Kirrawee DC, NSW 2232, Australia.*

<sup>b</sup> *Department of Structure Analysis, Institute of Physics of the CAS, Na Slovance 2, Praha 8, 182 00, Czech Republic.*

\* Corresponding author: *Email: [yzx@ansto.gov.au](mailto:yzx@ansto.gov.au) (Y. Zhang)*

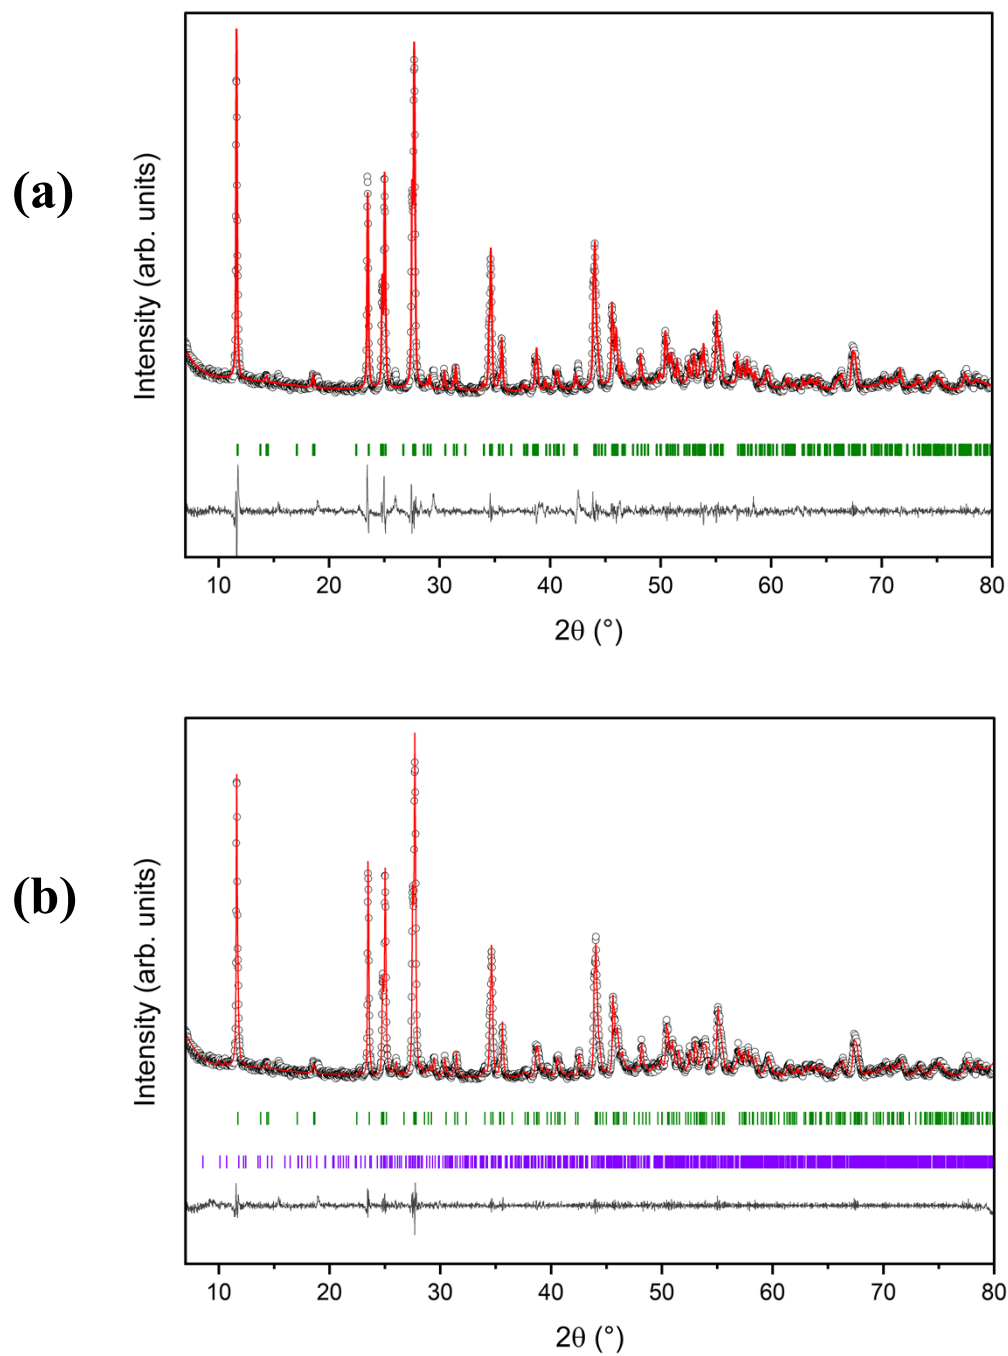

**Figure S1.** Le Bail fitting of PXRD data for compound U-N1: for U-N1 (a), U-N1 and meta-schoepite (b).

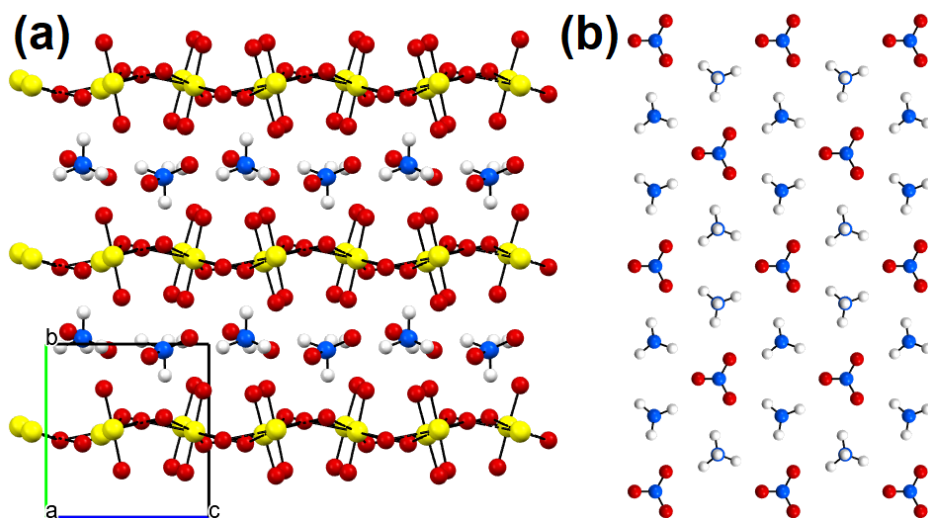

**Figure S2.** A ball-stick crystal packing view of compound U-N1 along the *a*-axis (a) and the interlayer cation and anion arrangement (b).

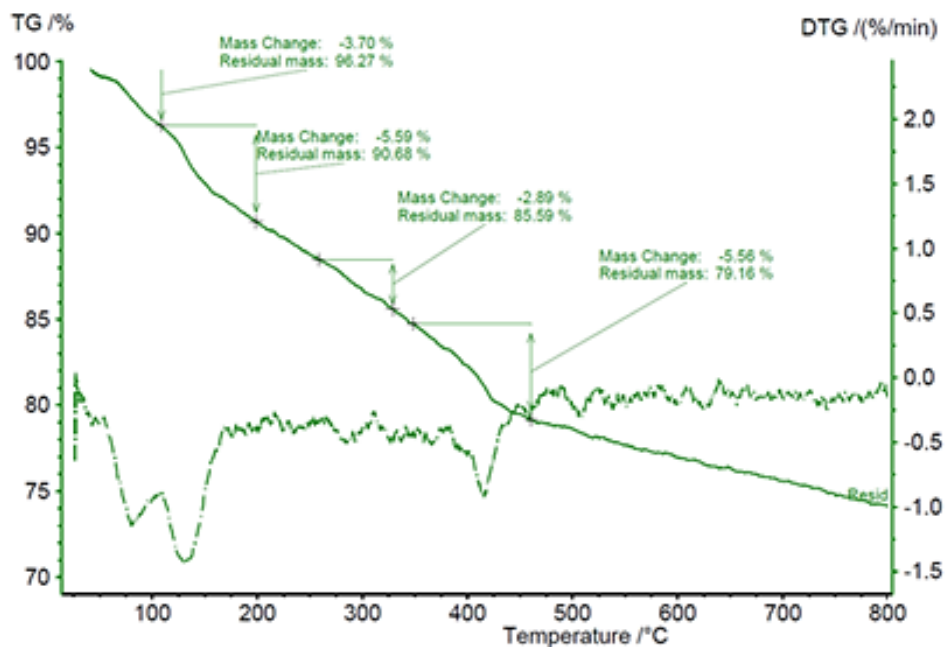

**Figure S3.** Thermal analysis results for compound U-N1.

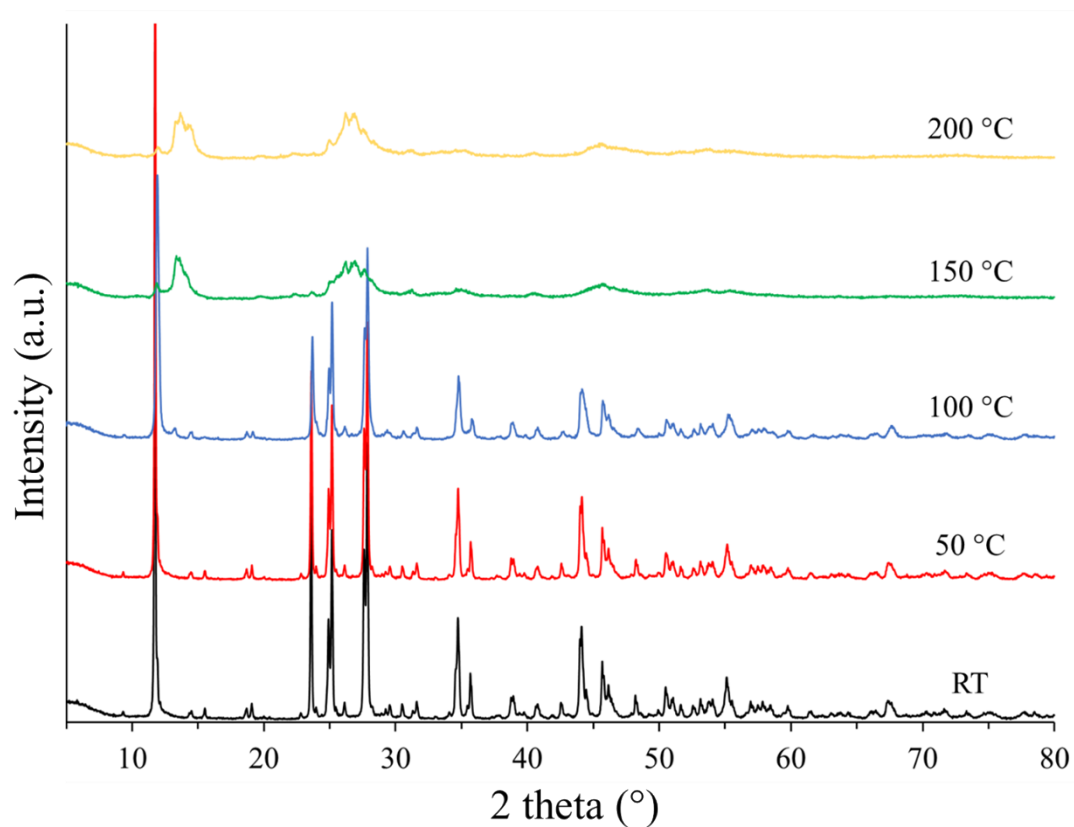

**Figure S4.** PXRD patterns of compound **U-N1** at room temperature (black) and after heating to 50°C (red), 100°C (blue), 150°C (green) and 200°C (yellow).

**Table S1.** Average EDS values for multiple point analyses and the U : N : O ratio for **U-N1**.

| Atom% U | Atom% N | Atom% O | U : N : O ratio |
|---------|---------|---------|-----------------|
| 16.5    | 17.0    | 66.5    | 1 : 1 : 4       |

**Table S2.** Analysis of Potential Hydrogen Bonds in U-N1.

| Donor–H···Acceptor | D–H (Å) | H···A (Å) | D···A (Å) | D–H···A (°) |
|--------------------|---------|-----------|-----------|-------------|
| N2–H2A···O2        | 1.11    | 2.11      | 2.9004(7) | 125         |
| N2–H2A···O9        | 1.11    | 2.24      | 3.1665(8) | 139'        |
| N2–H2B···O8        | 1.12    | 2.27      | 3.1475(8) | 133         |
| N2–H2B···O1        | 1.12    | 2.02      | 2.8388(7) | 127'        |
| N2–H2C···O3        | 1.12    | 1.81      | 2.9281(7) | 180         |
| N2–H2D···O6        | 1.11    | 2.50      | 3.1478(8) | 116         |
| N2–H2D···O7        | 1.11    | 2.40      | 2.8704(7) | 104'        |
| N2–H2D···O8        | 1.11    | 2.10      | 3.1061(8) | 150''       |

**Table S3.** Calculated bond valence sums (BVS) for cations and anions in compound U-N1.

|          | U1          | U2          |                  |
|----------|-------------|-------------|------------------|
| CN       | 7           | 7           | $\Sigma$         |
| O1       | 1.63        |             | <b>1.63</b>      |
| O2       | 1.60        |             | <b>1.60</b>      |
| O3       | 0.66, 0.65  | 0.67×2      | <b>1.98</b>      |
| O4       | 0.44, 0.33  | 0.51×2      | <b>1.28 (OH)</b> |
| O5       | 0.45        | 0.32        | <b>0.77 (OH)</b> |
| O6       |             | 1.60        | <b>1.60</b>      |
| O7       |             | 1.54        | <b>1.54</b>      |
| $\Sigma$ | <b>5.76</b> | <b>5.81</b> |                  |
